# Supplementary material for: Assessing the Needs of Transgender, Gender-Diverse, Ethnic and Religious Minorities, and Individuals with Disabilities in Singapore’s LGBTIQA+ Community
Source: Research Square preprint supplement (doi:10.21203/rs.3.rs-7373812/v1), 2025-09-24
Supplement: Supplementary file 1 [file 948cbb91a515acea640114ed.docx]

### Focus Group Discussion Questions

| Total time | Introduction & Icebreaker |
| --- | --- |
| 5 - 10 mins | 1. Please share a bit about yourself and why you decided to join today’s discussion. (Icebreaker) |
| 25 - 30 mins | Topic A: Experiences with Services |
| 1. Can you share a good experience when you felt supported or included when using a service? 2. Could you share a bad experience of when a service did not meet your needs? 3. Follow-up question: What made this experience a good or bad experience for you?   *Examples: Interactions with a healthcare provider, legal support, social services, mental health services* |
| 25 - 30 mins | Topic B: Barriers to Access |
| 1. As a LGBTQ+ person with other identities, can you describe some of the difficulties you experienced when accessing a service?   *Examples:* *Lack of resources e.g. information, affordability, or policy restrictions or Personal barriers e.g. shame, fear of discrimination*   1. What made that experience particularly difficult or challenging for you? 2. What kind of changes do you think would help you to access services? |
| Propose a **5-minute break** to reduce participant fatigue | |
| 15 - 20 mins | Topic C: Social Stigma and Community Support |
| 1. Have you ever felt left out or judged because of who you are? If so, in what kinds of spaces did you experience this in?   *Examples: School, work, religious spaces, or public places*   1. How do you think your experience with feeling excluded differs from that of others?   *Examples: Someone who is not a racial minority, someone who is cisgender, some who does not have a mental health condition, a person who is not disabled, and so on.* |
| 5 - 10 mins | Topic D: Ideal Services and Support |
| 1. What kind of services or support do you wish **existed** for individuals like you?   *Examples: Your wishlist, your observations from other countries* |
| 10 - 15 mins | Topic E: Collective Solutions |
| 1. What do you think organizations and communities can do to better support LGBTQ+ people with different backgrounds and needs?   *Examples: Type of services offered, marketing of workshops or events, event venues and spaces, language used*   1. (Optional) How can Rainbow Asia build on or work with the current strengths or support systems that you already have? |
